# Supplementary material for: Ensembles from silver clusters and cucurbit[6]uril-containing linkers
Source: Royal Society of Chemistry journal article supplement (doi:10.1039/d1dt02505h), 2021-01-01
Supplement: d1dt02505h1.pdf [file d1dt02505h1.pdf]

Supporting information

# Ensembles from Silver Clusters and Cucurbit[6]urils-contained Linkers

Na-Na Li,<sup>a,b</sup> Ming Yang,<sup>b</sup> Xiao-Jie Xu,<sup>c</sup> Xi-Yan Dong,<sup>\*a,b</sup> Si Li<sup>\*b</sup> and Shuang-Quan Zang<sup>a,b</sup>

<sup>a</sup>College of Chemistry and Chemical Engineering, Henan Polytechnic University Henan Key Laboratory of Coal Green Conversion, Henan Polytechnic University, Jiaozuo 454000, China

<sup>b</sup>Henan Key Laboratory of Crystalline Molecular Functional Materials, Henan International Joint Laboratory of Tumor Theranostical Cluster Materials, Green Catalysis Center, and College of Chemistry, Zhengzhou University, Zhengzhou 450001, China

<sup>c</sup>School of Physics and Electronic Information Engineering, Henan Polytechnic University, Jiaozuo 454000, China

E-mail: dongxiyan0720@hpu.edu.cn, lisi@zzu.edu.cn

**Table S1.** Crystal data and structure refinements for NC a and SCM 1.

|                                               | NC a                                                                                            | SCM 1                                                                                                 |
|-----------------------------------------------|-------------------------------------------------------------------------------------------------|-------------------------------------------------------------------------------------------------------|
| CCDC number                                   | 2095834                                                                                         | 2095835                                                                                               |
| Empirical                                     | C <sub>78</sub> H <sub>98</sub> Ag <sub>12</sub> N <sub>6</sub> O <sub>22</sub> S <sub>12</sub> | C <sub>100</sub> H <sub>119.96</sub> Ag <sub>12</sub> N <sub>28</sub> O <sub>36</sub> S <sub>14</sub> |
| Formula weight                                | 3150.78                                                                                         | 4033.48                                                                                               |
| Temperature/K                                 | 200.00(10)                                                                                      | 200.00(10)                                                                                            |
| Crystal system                                | monoclinic                                                                                      | monoclinic                                                                                            |
| Space group                                   | <i>P</i> 2 <sub>1</sub> / <i>n</i>                                                              | <i>P</i> 2/ <i>c</i>                                                                                  |
| <i>a</i> /Å                                   | 15.88620(10)                                                                                    | 14.7785(17)                                                                                           |
| <i>b</i> /Å                                   | 12.60960(10)                                                                                    | 15.0645(13)                                                                                           |
| <i>c</i> /Å                                   | 25.3661(2)                                                                                      | 29.008(3)                                                                                             |
| <i>α</i> /°                                   | 90                                                                                              | 90                                                                                                    |
| <i>β</i> /°                                   | 94.1890(10)                                                                                     | 92.988(10)                                                                                            |
| <i>γ</i> /°                                   | 90                                                                                              | 90                                                                                                    |
| Volume /Å <sup>3</sup>                        | 5067.73(7)                                                                                      | 6449.3(11)                                                                                            |
| <i>Z</i>                                      | 2                                                                                               | 2                                                                                                     |
| <i>ρ</i> <sub>calc</sub> g/cm <sup>3</sup>    | 2.065                                                                                           | 2.077                                                                                                 |
| <i>μ</i> /mm <sup>-1</sup>                    | 21.029                                                                                          | 17.144                                                                                                |
| F(000)                                        | 3080.0                                                                                          | 3984.0                                                                                                |
| Radiation                                     | Cu Kα (λ = 1.54184)                                                                             | Cu Kα (λ = 1.54184)                                                                                   |
| Reflections collected                         | 26038                                                                                           | 34606                                                                                                 |
| Independent reflections                       | 9910 [ <i>R</i> <sub>int</sub> = 0.0356, <i>R</i> <sub>sigma</sub> = 0.0399]                    | 12669 [ <i>R</i> <sub>int</sub> = 0.0865, <i>R</i> <sub>sigma</sub> = 0.0725]                         |
| Data/restraints/parameters                    | 9910/109/678                                                                                    | 12669/1083/1331                                                                                       |
| Goodness-of-fit on F <sup>2</sup>             | 1.048                                                                                           | 1.072                                                                                                 |
| Final R indexes [ <i>I</i> >= 2σ( <i>I</i> )] | <i>R</i> <sub>1</sub> = 0.0323, <i>wR</i> <sub>2</sub> = 0.0827                                 | <i>R</i> <sub>1</sub> = 0.1317, <i>wR</i> <sub>2</sub> = 0.3430                                       |
| Final R indexes [all data]                    | <i>R</i> <sub>1</sub> = 0.0360, <i>wR</i> <sub>2</sub> = 0.0850                                 | <i>R</i> <sub>1</sub> = 0.1558, <i>wR</i> <sub>2</sub> = 0.3621                                       |

$$R_1 = \frac{\sum ||F_o| - |F_c||}{\sum |F_o|} \quad |wR_2 = \frac{[\sum w(F_o^2 - F_c^2)^2]}{\sum w(F_o^2)^2}]^{1/2}$$

**Table S2.** Crystal data and structure refinements for **SCM 2** and **SCM 3**.

|                                                              | <b>SCM 2</b>                                                                                                            | <b>SCM 3</b>                                                                                      |
|--------------------------------------------------------------|-------------------------------------------------------------------------------------------------------------------------|---------------------------------------------------------------------------------------------------|
| CCDC number                                                  | 2095836                                                                                                                 | 2095837                                                                                           |
| Empirical                                                    | C <sub>137</sub> H <sub>150.5</sub> Ag <sub>12</sub> F <sub>24</sub> N <sub>32.5</sub> O <sub>33.5</sub> S <sub>6</sub> | C <sub>88</sub> H <sub>148</sub> Ag <sub>12</sub> N <sub>32</sub> O <sub>40</sub> S <sub>14</sub> |
| Formula weight                                               | 4731.19                                                                                                                 | 4037.66                                                                                           |
| Temperature/K                                                | 200.00(10)                                                                                                              | 199.99(10)                                                                                        |
| Crystal system                                               | monoclinic                                                                                                              | triclinic                                                                                         |
| Space group                                                  | <i>P</i> <sub>2</sub> <sub>1</sub> / <i>n</i>                                                                           | <i>P</i> -1                                                                                       |
| <i>a</i> /Å                                                  | 15.29384(8)                                                                                                             | 13.9198(2)                                                                                        |
| <i>b</i> /Å                                                  | 25.34019(12)                                                                                                            | 14.8144(2)                                                                                        |
| <i>c</i> /Å                                                  | 21.44672(10)                                                                                                            | 18.0353(2)                                                                                        |
| <i>α</i> /°                                                  | 90                                                                                                                      | 79.5070(10)                                                                                       |
| <i>β</i> /°                                                  | 90.4025(5)                                                                                                              | 80.7700(10)                                                                                       |
| <i>γ</i> /°                                                  | 90                                                                                                                      | 79.2250(10)                                                                                       |
| Volume /Å <sup>3</sup>                                       | 8311.44(7)                                                                                                              | 3561.59(8)                                                                                        |
| <i>Z</i>                                                     | 2                                                                                                                       | 1                                                                                                 |
| $\rho_{calc}$ g/cm <sup>3</sup>                              | 1.890                                                                                                                   | 1.883                                                                                             |
| $\mu$ /mm <sup>-1</sup>                                      | 12.715                                                                                                                  | 15.546                                                                                            |
| F(000)                                                       | 4688.0                                                                                                                  | 2008.0                                                                                            |
| Radiation                                                    | Cu K $\alpha$ ( $\lambda$ = 1.54184)                                                                                    | Cu K $\alpha$ ( $\lambda$ = 1.54184)                                                              |
| Reflections collected                                        | 89844                                                                                                                   | 37672                                                                                             |
| Independent reflections                                      | 16623 [ <i>R</i> <sub>int</sub> = 0.0451,<br><i>R</i> <sub>sigma</sub> = 0.0302]                                        | 13836 [ <i>R</i> <sub>int</sub> = 0.0719,<br><i>R</i> <sub>sigma</sub> = 0.0673]                  |
| Data/restraints/parameters                                   | 16623/660/1405                                                                                                          | 13836/64/956                                                                                      |
| Goodness-of-fit on <i>F</i> <sup>2</sup>                     | 1.024                                                                                                                   | 1.033                                                                                             |
| Final <i>R</i> indexes [ <i>I</i> ≥ 2 $\sigma$ ( <i>I</i> )] | <i>R</i> <sub><i>I</i></sub> = 0.0392, <i>wR</i> <sub>2</sub> = 0.1003                                                  | <i>R</i> <sub><i>I</i></sub> = 0.0631, <i>wR</i> <sub>2</sub> = 0.1750                            |
| Final <i>R</i> indexes [all data]                            | <i>R</i> <sub><i>I</i></sub> = 0.0452, <i>wR</i> <sub>2</sub> = 0.1003                                                  | <i>R</i> <sub><i>I</i></sub> = 0.0736, <i>wR</i> <sub>2</sub> = 0.1808                            |

$$R_1 = \frac{\sum ||F_o| - |F_c||}{\sum |F_o|} \quad |wR_2 = \frac{[\sum w(F_o^2 - F_c^2)^2 / \sum w(F_o^2)^2]^{1/2}}$$

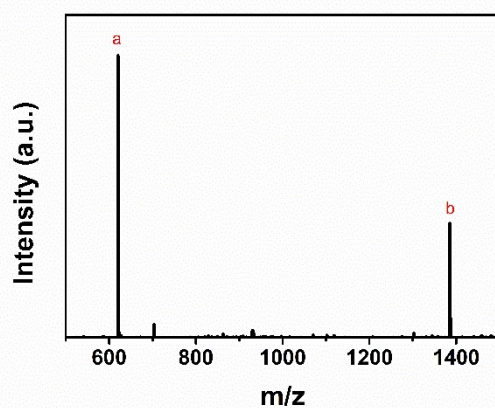

**Fig. S1.** ESI-MS spectrum of the solution of **L·PF<sub>6</sub>** (obtained from dissolving **L·PF<sub>6</sub>** in DMF) in the positive mode.

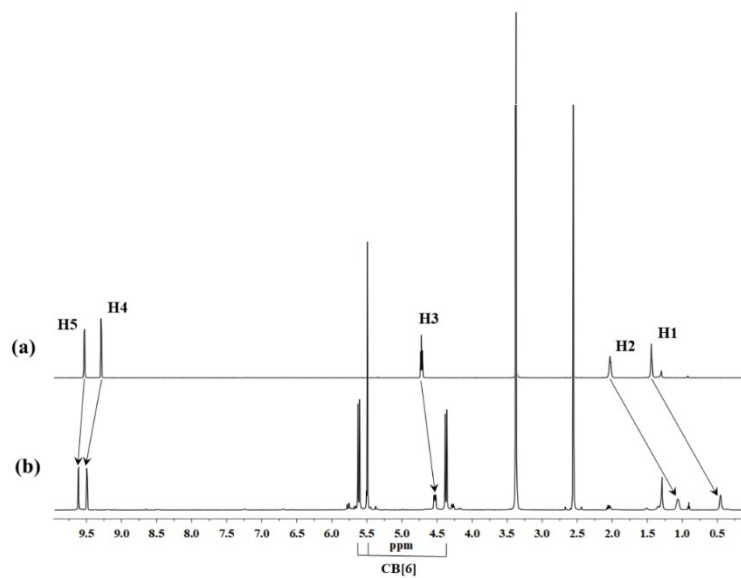

**Fig. S2.**  $^1\text{H}$  NMR spectra of (a) the guest molecule BPHB and (b) the pseudorotaxane  $\text{L}\cdot\text{PF}_6$  in  $(\text{CD}_3)_2\text{SO}$ .

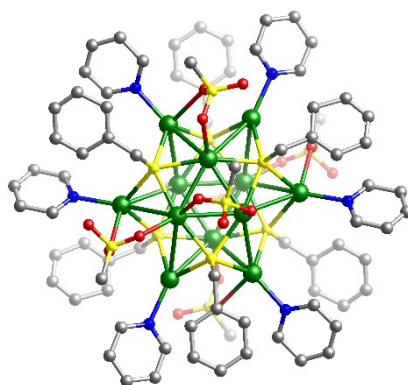

**Fig. S3.** The crystal structure of NC **a**. Color labels: Ag, green; S yellow; N, blue; C, gray; O, red.

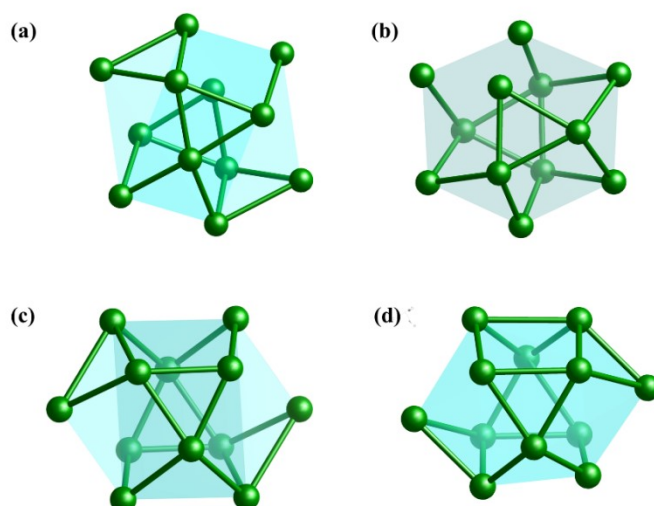

**Fig. S4.** Perspective view of the  $D_{3d}$  cuboctahedron in the  $\text{Ag}_{12}\text{S}_6$  core skeleton with  $\text{Ag}_3\text{-Ag}_6\text{-Ag}_3$  three-layer arrangement in (a) NC **a** and (b-c) SCM **1-3**. Color labels: Ag, green.

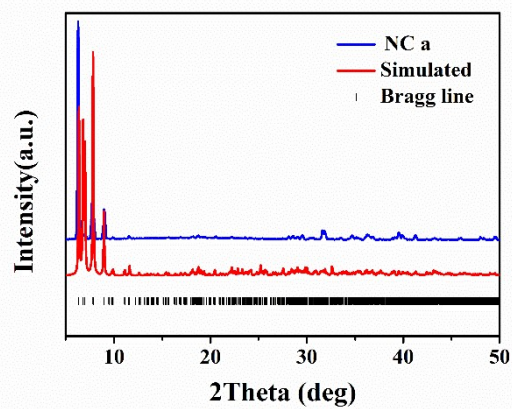

Fig. S5. PXRD patterns of NC a.

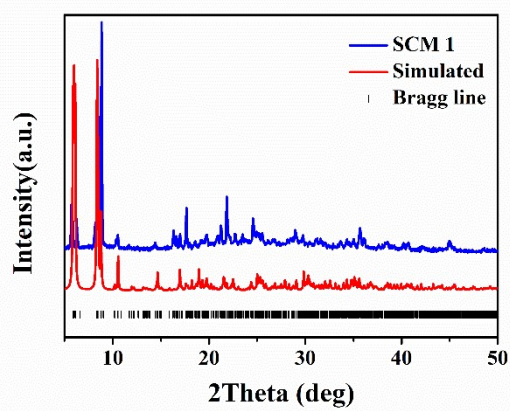

Fig. S6. PXRD patterns of SCM 1.

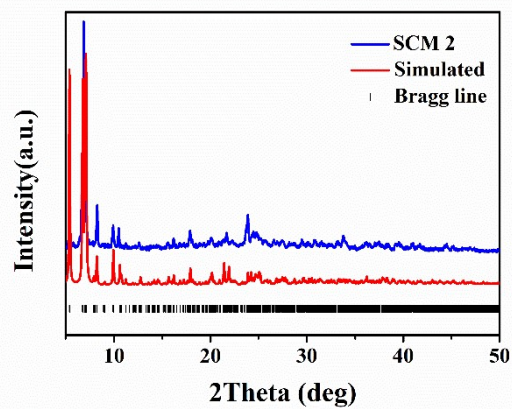

Fig. S7. PXRD patterns of SCM 2.

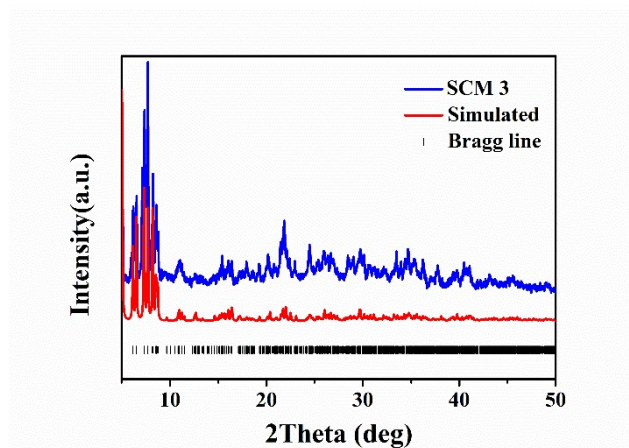

Fig. S8. PXR D patterns of SCM 3.

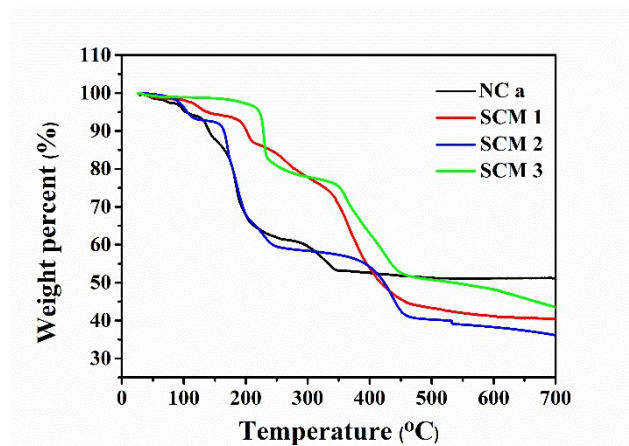

Fig. S9. The TGA curves for NC a and SCM 1-3.

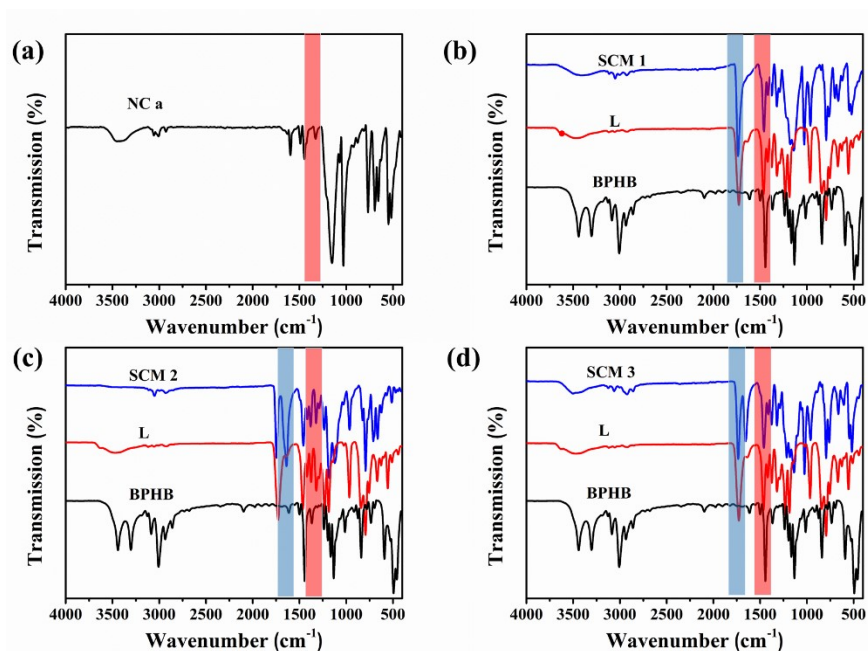

Fig. S10. (a) The IR spectrum of NC a. (b) The IR spectra of SCM 1, L·PF<sub>6</sub>, and BPHB. (c) The IR spectra of SCM 2, L·PF<sub>6</sub> and BPHB. (d) The IR spectra of SCM 3, L·PF<sub>6</sub> and BPHB.

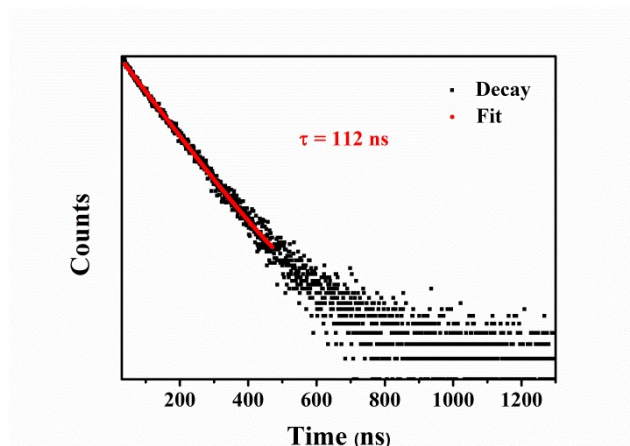

Fig. S11. Emission lifetime of NC a measured at 575 nm at 298 K.

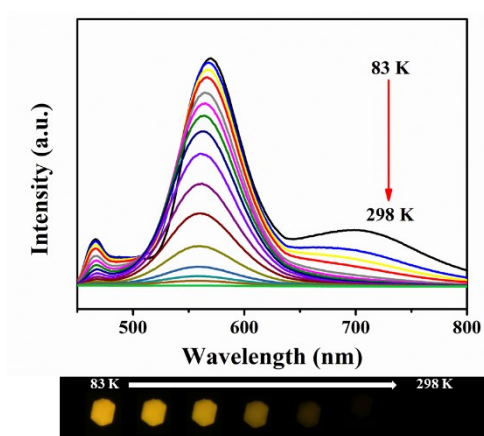

Fig. S12. Variable-temperature emission spectra and crystal luminescence photographs of NC a.

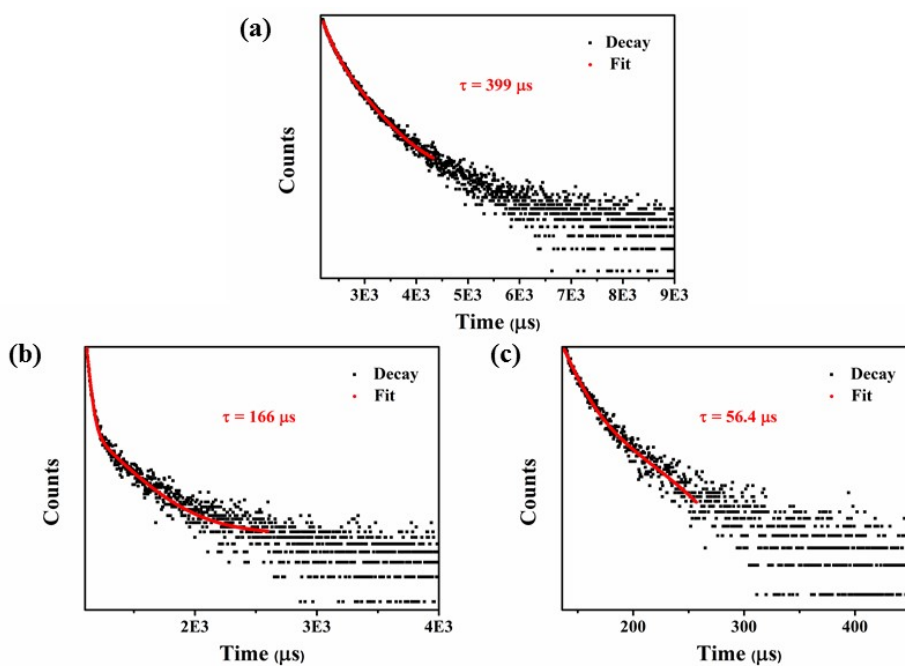

Fig. S13. Photoluminescence decay profile of NC a measured at (a) 465nm, (b) 570 nm, and (c) 704 nm at 83 K.

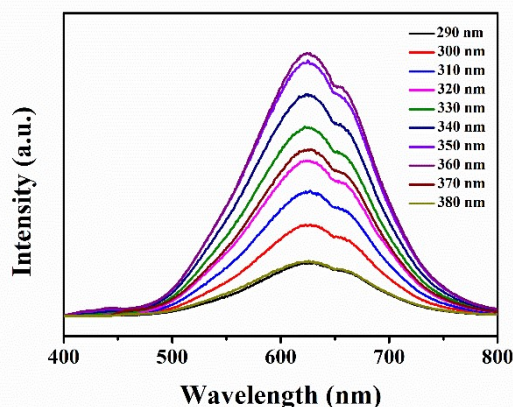

Fig. S14. Solid-state emission spectra of SCM 1 at different excitation wavelengths at room temperature.

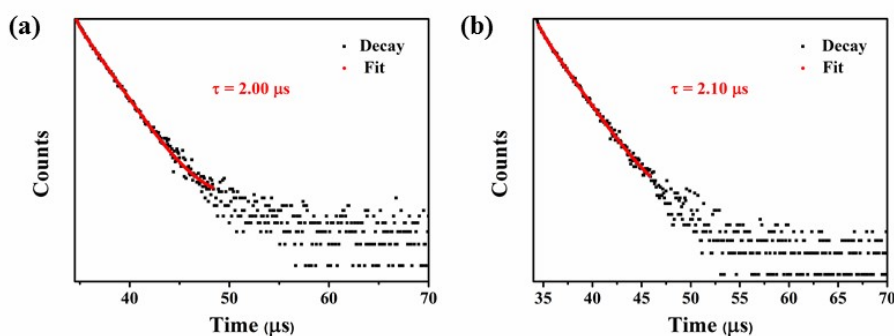

Fig. S15. Emission lifetime of SCM 1 measured at (a) 630 nm and (b) 656 nm at 298 K.

Table S3. The rate of radiative transition ( $k_r$ ) and non-radiative transition ( $k_{nr}$ ) of T1 state were obtained according to following equations (assuming the efficiency of intersystem crossing is 100%), where  $\Phi$  represents the corresponding quantum yield:

$$k_{nr} + k_r = 1/\tau$$

$$k_r = \Phi(k_{nr} + k_r)$$

| compound | $\Phi$ | $\tau$                                                | $k_r$ ( $s^{-1}$ ) | $k_{nr}$ ( $s^{-1}$ ) |
|----------|--------|-------------------------------------------------------|--------------------|-----------------------|
| NC a     | 0.22 % | 120 ns                                                | $1.83 \times 10^4$ | $8.33 \times 10^6$    |
| SCM 1    | 4.88 % | $2.00 \mu s$ ( $\lambda_{em} = 630 \text{ nm}$ )      | $2.44 \times 10^4$ | $4.76 \times 10^5$    |
| SCM 2    | 0.18 % | 92.9 ns                                               | $1.94 \times 10^4$ | $1.08 \times 10^7$    |
| SCM 3    | 4.04 % | $67.6 \text{ ns}$ ( $\lambda_{em} = 572 \text{ nm}$ ) | $5.98 \times 10^5$ | $1.48 \times 10^8$    |

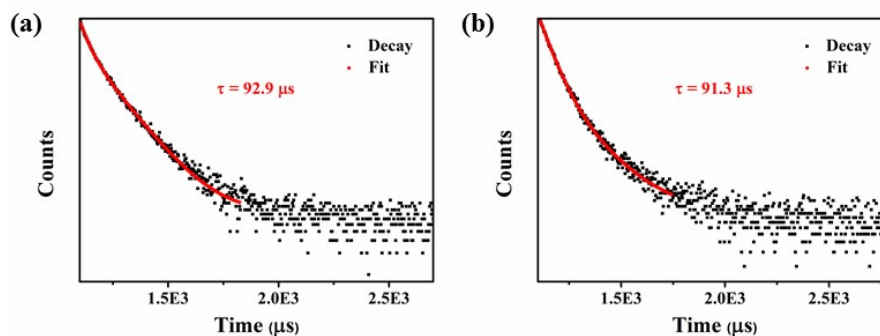

Fig. S16. Photoluminescence decay profile of SCM 1 measured at (a) 585 nm and (b) 672 nm at 83 K.

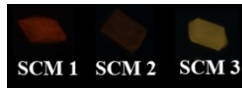

Fig. S17. Fluorescence photos of SCM 1-3 under the exposure time of 3.25 s.

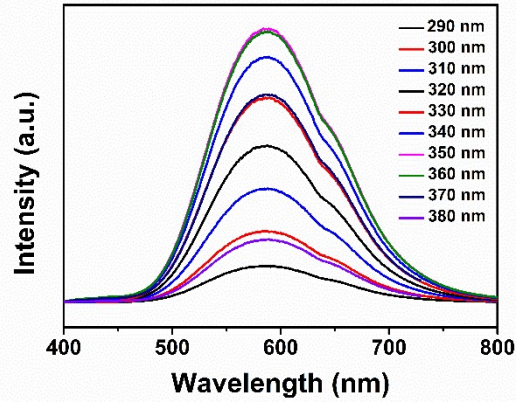

Fig. S18. Solid-state emission spectra of SCM 3 at different excitation wavelengths at room temperature.

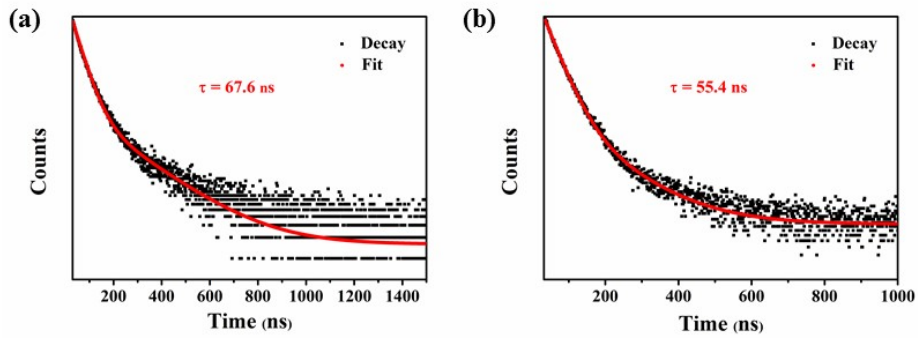

Fig. S19. Emission lifetime of SCM 3 at measured at (a) 572 nm and (b) 655 nm at 298 K.

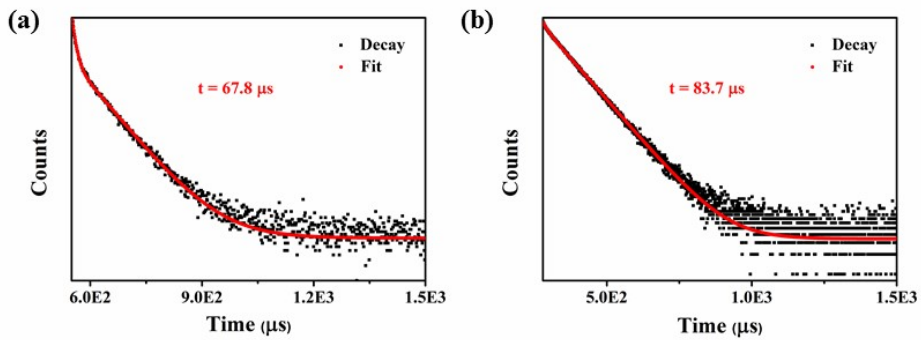

Fig. S20. Photoluminescence decay profile of SCM 3 measured at (a) 583 nm and (b) 655 nm at 83 K.



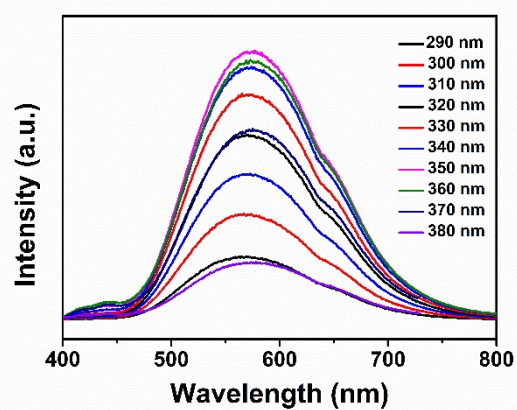

Fig. S21. Solid-state emission spectra of SCM 2 at different excitation wavelengths at room temperature.

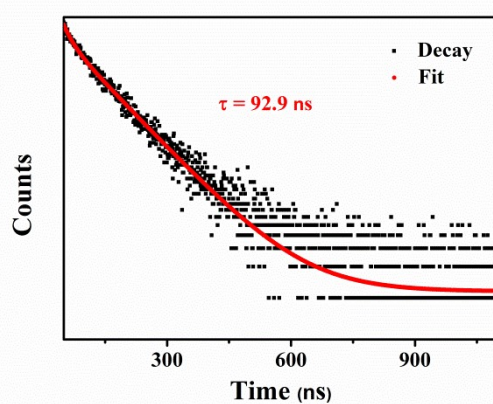

Fig.22. Emission lifetime of SCM 2 measured at 578 nm at 298 K.

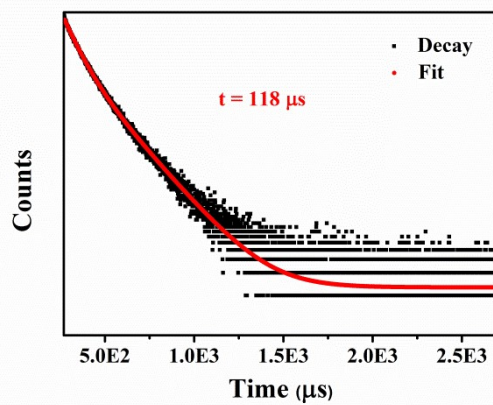

Fig. S23. Photoluminescence decay profile of SCM 2 measured at 610 nm at 83 K.

**Table S4.** Emission wavelength ( $\lambda_{em}$ ), lifetimes ( $\tau$ ) and the corresponding fractional contributions (%) of the solid-state samples at 298 k and 83 k, respectively ( $\chi^2$ : fitting parameter).

| <b>Compound-298K</b> | $\lambda_{em}$ | $\chi^2$ | $\tau_1(\%)$        | $\tau_2(\%)$        | $\tau$       |
|----------------------|----------------|----------|---------------------|---------------------|--------------|
| <b>NC a</b>          | 575 nm         | 1.00     | 112 ns(100)         |                     | 112 ns       |
| <b>SCM 1</b>         | 630 nm         | 1.04     | 0.305 $\mu$ s(7.01) | 2.14 $\mu$ s(92.99) | 2.00 $\mu$ s |
|                      | 656 nm         | 0.98     | 0.668 $\mu$ s(4.63) | 2.20 $\mu$ s(95.37) | 2.10 $\mu$ s |
| <b>SCM 2</b>         | 578 nm         | 0.94     | 20.3 ns(13.18)      | 104 ns(86.82)       | 92.9 ns      |
| <b>SCM 3</b>         | 572 nm         | 1.16     | 176 ns(22.04)       | 37.1 ns(77.96)      | 67.6 ns      |
|                      | 655 nm         | 1.16     | 36.3 ns(78.69)      | 126 ns(21.31)       | 55.4 ns      |
| <b>Compound-83 K</b> | $\lambda_{em}$ | $\chi^2$ | $\tau_1(\%)$        | $\tau_2(\%)$        | $\tau$       |
| <b>NC a</b>          | 465 nm         | 1.11     | 156 $\mu$ s(26.74)  | 487 $\mu$ s(73.26)  | 399 $\mu$ s  |
|                      | 580 nm         | 1.19     | 26.4 $\mu$ s(44.77) | 279 $\mu$ s(55.23)  | 166 $\mu$ s  |
|                      | 704 nm         | 1.06     | 79.9 $\mu$ s(64.26) | 14.1 $\mu$ s(35.74) | 56.4 $\mu$ s |
| <b>SCM 1</b>         | 585 nm         | 1.15     | 36.5 $\mu$ s(28.12) | 115 $\mu$ s(71.88)  | 92.9 $\mu$ s |
|                      | 672 nm         | 1.04     | 55.5 $\mu$ s(64.22) | 156 $\mu$ s(35.78)  | 91.3 $\mu$ s |
| <b>SCM 2</b>         | 610 nm         | 1.00     | 69.4 $\mu$ s(48.14) | 163 $\mu$ s(51.86)  | 118 $\mu$ s  |
| <b>SCM 3</b>         | 583 nm         | 1.19     | 9.42 $\mu$ s(20.01) | 82.4 $\mu$ s(79.99) | 67.8 $\mu$ s |
|                      | 655 nm         | 1.18     | 17.0 $\mu$ s(2.92)  | 85.7 $\mu$ s(97.08) | 83.7 $\mu$ s |
